# Supplementary material for: CoV Genome Tracker: tracing genomic footprints of Covid-19 pandemic
Source: bioRxiv or medRxiv preprint supplement (doi:10.1101/2020.04.10.036343), 2020-04-14
Supplement: Supplementary file [file media-1.pdf]

## Supplemental Figure S1.

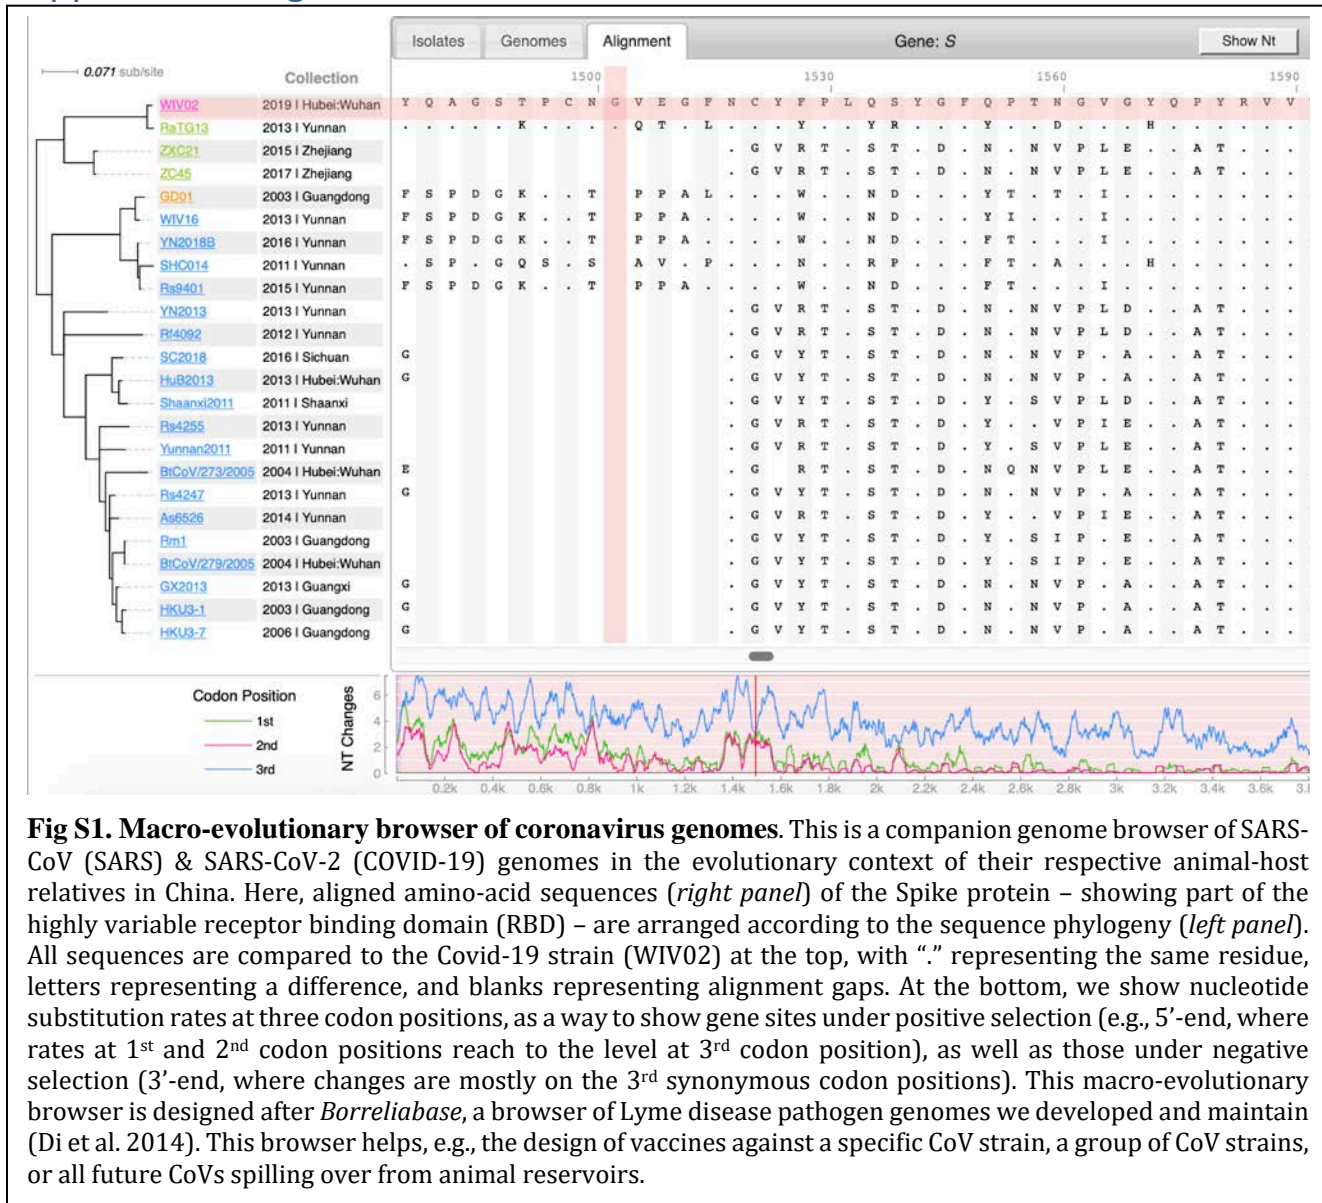

**Fig S1. Macro-evolutionary browser of coronavirus genomes.** This is a companion genome browser of SARS-CoV (SARS) & SARS-CoV-2 (COVID-19) genomes in the evolutionary context of their respective animal-host relatives in China. Here, aligned amino-acid sequences (*right panel*) of the Spike protein – showing part of the highly variable receptor binding domain (RBD) – are arranged according to the sequence phylogeny (*left panel*). All sequences are compared to the Covid-19 strain (WIV02) at the top, with “.” representing the same residue, letters representing a difference, and blanks representing alignment gaps. At the bottom, we show nucleotide substitution rates at three codon positions, as a way to show gene sites under positive selection (e.g., 5'-end, where rates at 1<sup>st</sup> and 2<sup>nd</sup> codon positions reach to the level at 3<sup>rd</sup> codon position), as well as those under negative selection (3'-end, where changes are mostly on the 3<sup>rd</sup> synonymous codon positions). This macro-evolutionary browser is designed after *Borreliabase*, a browser of Lyme disease pathogen genomes we developed and maintain (Di et al. 2014). This browser helps, e.g., the design of vaccines against a specific CoV strain, a group of CoV strains, or all future CoVs spilling over from animal reservoirs.

Reference cited:

Di L, Pagan PE, Packer D, Martin CL, Akther S, Ramrattan G, et al. *Borreliabase*: a phylogeny-centered browser of *Borrelia* genomes. BMC Bioinformatics. 2014 Jul 3;15(1):233.
